# Supplementary material for: Microcrystalline cellulose for the dispersive solid-phase microextraction and sensitive determination of chromium in water using electrothermal atomic absorption spectrometry
Source: Royal Society of Chemistry journal article supplement (doi:10.1039/c8ja00215k), 2018-01-01
Supplement: c8ja00215k2.pdf [file c8ja00215k2.pdf]

**Table S1**

Recovery values of Cr(III) and total Cr determined at different ratios

| Cr(III)/Cr(VI) | Cr(III), ng L <sup>-1</sup> |                    |             | Cr (total), ng L <sup>-1</sup> |             |
|----------------|-----------------------------|--------------------|-------------|--------------------------------|-------------|
|                | Added                       | Found <sup>a</sup> | Recovery, % | Found <sup>b</sup>             | Recovery, % |
| 0.1            | 50                          | 48 ± 2             | 96          | 552 ± 6                        | 101         |
| 1              | 250                         | 252 ± 5            | 101         | 505 ± 5                        | 101         |
| 5              | 300                         | 299 ± 4            | 99          | 357 ± 4                        | 95          |
| 10             | 500                         | 503 ± 6            | 101         | 551 ± 5                        | 96          |

<sup>a</sup> n=5

<sup>b</sup> after reduction with iron (II) at pH = 2.3
