# Supplementary figures and images for: Microcrystalline cellulose for the dispersive solid-phase microextraction and sensitive determination of chromium in water using electrothermal atomic absorption spectrometry
Source: Royal Society of Chemistry journal article supplement (doi:10.1039/c8ja00215k), 2018-01-01

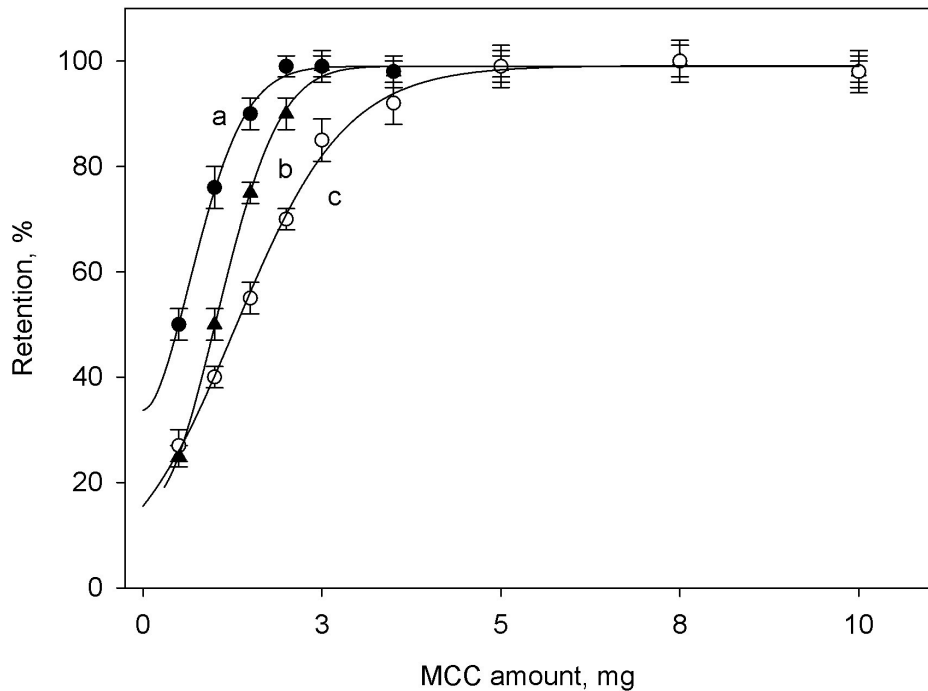

Supplement: c8ja00215k1.pdf [file c8ja00215k1.pdf]
